# Supplementary material for: Application of artificially intelligent systems for the identification of discrete fossiliferous levels
Source: PeerJ. 2020 Mar 11;8:e8767. doi: 10.7717/peerj.8767 (PMC7071820; doi:10.7717/peerj.8767)
Supplement: Supplemental Information 2 [file peerj-08-8767-s002.xlsx]

## Sheet: Batallones_10_y
x	y	z
990	-20	-200
997	0	-323
920	6	-190
936	7	-201
995	7	-335
995	8	-335
997	13	-342
997	13	-345
990	15	-184
997	15	-342
997	15	-345
997	16	-345
973	20	-174
961	27	-175
970	32	-202
946	34	-191
929	35	-176
950	36	-179
874	37	-185
965	37	-207
950	50	-204
967	50	-209
952	57	-205
986	58	-219
972	59	-211
972	59	-211
974	59	-211
977	59	-210
982	60	-218
930	62	-203
903	63	-244
915	63	-199
950	64	-211
860	67	-185
910	67	-184
964	67	-211
998	68	-205
973	71	-200
968	72	-212
949	73	-120
913	74	-221
971	75	-210
980	75	-208
962	77	-210
958	78	-214
866	79	-189
998	79	-205
859	81	-208
949	81	-211
990	82	-213
993	82	-207
917	83	-212
938	83	-209
954	84	-199
955	85	-211
946	88	-212
967	88	-209
1000	88	-214
833	90	-213
918	90	-212
985	95	-258
1000	97	-214
940	98	-157
872	100	-217
920	100	-230
955	101	-213
998	102	-255
924	103	-210
997	104	-215
928	105	-214
979	105	-163
937	106	-217
962	107	-214
1000	107	-258
829	108	-208
984	112	-284
957	113	-213
866	118	-130
913	120	-223
1000	120	-158
939	121	-216
960	122	-179
909	124	-220
891	125	-213
954	125	-294
1000	126	-304
817	127	-293
927	129	-220
862	130	-227
884	130	-202
975	130	-188
952	132	-241
966	135	-399
975	136	-186
980	136	-173
978	139	-345
841	140	-252
990	140	-254
939	144	-264
975	145	-186
870	146	-250
872	146	-282
980	146	-287
942	147	-268
954	148	-259
822	150	-319
970	150	-176
936	151	-269
821	152	-320
821	152	-325
976	152	-271
932	153	-267
987	154	-252
1000	154	-263
973	155	-176
867	157	-288
990	158	-261
902	160	-281
968	160	-267
1000	160	-187
913	165	-252
990	165	-268
994	165	-195
993	168	-260
826	169	-338
922	169	-242
935	171	-259
974	171	-200
944	174	-280
825	175	-338
874	175	-288
899	175	-183
887	176	-289
887	176	-289
978	176	-417
904	180	-277
907	180	-274
962	180	-345
858	181	-363
981	181	-268
970	184	-343
892	187	-235
988	187	-272
835	188	-350
942	189	-417
972	189	-342
998	189	-269
824	190	-337
937	191	-239
878	193	-207
977	195	-341
1000	195	-269
972	196	-303
987	196	-289
920	198	-290
944	198	-236
986	198	-263
938	200	-267
938	200	-267
988	200	-168
810	201	-354
917	201	-234
918	201	-234
920	201	-234
936	201	-205
927	202	-237
991	202	-161
825	203	-359
957	203	-359
950	205	-168
993	206	-375
965	207	-358
831	209	-189
898	210	-410
896	211	-304
898	211	-410
898	211	-411
899	211	-409
985	211	-390
898	212	-410
966	212	-359
897	213	-412
899	213	-413
959	215	-351
950	217	-362
967	217	-175
968	217	-359
992	217	-214
885	218	-430
995	218	-285
827	220	-180
926	220	-182
830	222	-380
816	223	-189
820	223	-382
894	223	-308
977	223	-280
972	224	-360
989	224	-163
866	225	-195
999	225	-437
1000	225	-380
1000	225	-385
962	226	-187
901	227	-418
901	227	-424
820	228	-382
971	228	-364
870	229	-129
848	230	-221
947	230	-164
971	230	-363
988	230	-280
830	231	-381
926	231	-428
936	231	-421
980	233	-160
990	233	-188
992	233	-382
993	233	-271
825	234	-140
922	234	-428
966	234	-208
908	235	-299
926	235	-428
993	235	-272
991	236	-172
824	237	-276
898	237	-281
921	237	-427
922	237	-428
926	238	-428
966	240	-292
971	240	-300
995	240	-380
926	241	-428
969	241	-278
966	243	-292
949	244	-380
860	245	-142
889	245	-300
940	245	-315
977	245	-275
991	245	-390
991	245	-390
991	245	-390
991	245	-390
991	245	-390
991	245	-380
997	245	-273
971	246	-286
1000	246	-381
938	247	-160
819	248	-258
830	248	-440
950	248	-52
874	249	-120
947	249	-392
947	249	-392
965	249	-161
1000	249	-270
907	250	-240
918	250	-229
946	250	-177
975	250	-290
989	250	-270
909	251	-236
920	251	-433
926	251	-430
946	251	-286
970	252	-176
982	252	-200
965	254	-272
931	255	-176
937	255	-293
991	256	-385
806	257	-150
921	257	-230
946	257	-225
982	257	-389
820	258	-277
968	258	-215
931	259	-227
983	259	-175
991	259	-160
810	260	-210
810	260	-210
930	260	-225
960	260	-268
963	260	-390
963	260	-390
963	260	-390
970	260	-213
979	260	-219
983	260	-218
992	260	-200
933	262	-303
973	262	-392
973	262	-390
983	262	-398
940	263	-461
982	263	-394
983	263	-397
983	263	-398
885	264	-249
948	264	-220
960	264	-220
968	264	-219
913	265	-238
940	265	-229
968	265	-229
973	265	-390
981	265	-396
982	265	-398
897	266	-135
937	267	-229
1003	267	-203
878	268	-299
897	268	-241
912	268	-240
913	268	-239
918	268	-324
969	268	-396
991	268	-206
895	269	-242
910	269	-239
911	269	-244
802	270	-242
902	270	-239
912	270	-236
934	270	-230
962	270	-221
990	270	-392
991	270	-208
960	271	-173
995	271	-269
910	272	-242
948	272	-386
987	272	-207
964	273	-227
967	273	-221
985	273	-163
993	273	-212
854	274	-142
910	274	-236
957	274	-227
970	274	-174
945	275	-233
945	275	-232
957	275	-229
940	276	-237
950	276	-151
969	276	-225
988	276	-211
999	277	-218
841	278	-251
950	278	-444
957	278	-230
966	278	-165
1008	278	-202
826	279	-296
944	279	-236
1005	279	-202
1009	279	-203
928	280	-300
950	280	-233
959	280	-223
996	280	-297
1008	280	-204
870	281	-161
944	281	-298
957	281	-231
981	281	-282
842	282	-258
958	282	-225
962	282	-163
932	283	-234
937	283	-231
959	283	-222
993	283	-479
944	284	-428
958	284	-227
914	285	-314
939	285	-235
983	285	-280
841	286	-238
970	286	-296
980	286	-147
838	287	-145
938	287	-301
984	287	-278
902	288	-465
960	288	-300
963	288	-167
902	289	-229
902	289	-228
875	290	-426
888	290	-154
888	291	-246
825	292	-229
876	292	-197
846	293	-132
868	293	-122
822	297	-228
992	297	0
869	298	-190
984	298	-162
812	299	-228
823	299	-239
827	299	-231
817	300	-230
820	300	-225
820	300	-225
840	300	-220
864	300	-426
865	300	-426
916	300	-237
926	300	-302
935	300	-296
940	300	-459
989	301	-321
828	302	-232
833	302	-236
847	302	-422
953	302	-150
823	303	-231
829	303	-232
827	304	-232
950	304	-160
826	305	-232
840	305	-427
882	305	-168
940	305	-303
990	305	-218
890	308	-260
975	309	-432
866	310	-425
873	310	-140
900	310	-246
926	310	-291
957	310	-428
976	310	-300
816	311	-227
863	311	-422
964	311	-292
958	312	-224
938	313	-306
988	314	-279
878	315	-126
970	315	-286
928	316	-166
956	316	-296
863	318	-426
877	318	-426
883	318	-147
872	321	-136
815	322	-125
814	323	-435
816	323	-221
816	323	-221
821	323	-221
944	323	-459
953	323	-297
890	324	-284
817	325	-221
818	325	-221
872	325	-432
882	325	-148
939	325	-172
968	325	-158
811	326	-222
924	326	-256
953	329	-423
826	330	-125
865	330	-154
892	330	-430
897	330	-428
898	330	-428
812	331	-211
929	331	-309
974	331	-155
941	332	-173
960	332	-438
825	333	-223
834	333	-172
804	334	-208
867	335	-435
926	338	-430
980	338	-153
899	339	-441
882	340	-430
956	340	-436
965	340	-157
970	340	-300
989	340	-233
952	341	-428
808	343	-441
916	343	-426
834	344	-444
956	344	-433
869	345	-442
944	345	-173
964	345	-290
846	346	-430
935	346	-279
941	346	-297
862	347	-429
917	347	-426
940	347	-433
869	349	-444
870	349	-444
893	349	-429
995	349	-154
878	350	-167
880	350	-440
895	350	-433
942	350	-435
886	351	-434
898	351	-168
900	351	-434
903	351	-160
937	351	-175
942	351	-297
945	351	-436
942	352	-176
888	353	-160
897	353	-431
970	353	-450
971	353	-287
980	353	-285
962	354	-424
994	354	-278
868	355	-192
961	355	-425
855	356	-446
924	356	-473
933	358	-485
826	360	-446
830	360	-379
862	360	-268
875	360	-445
988	360	-465
932	362	-420
958	362	-296
827	363	-445
852	363	-195
878	363	-445
953	364	-437
974	364	-227
915	365	-432
848	366	-448
937	366	-430
849	367	-448
915	367	-430
822	368	-448
850	368	-448
895	368	-434
935	368	-432
964	368	-428
851	369	-448
820	370	-422
822	370	-448
852	370	-447
854	370	-449
856	370	-435
857	370	-435
898	370	-434
947	370	-451
856	371	-435
900	371	-442
870	372	-271
945	372	-418
1090	372	-285
922	373	-429
923	373	-308
846	375	-430
854	375	-144
960	375	-295
986	375	-471
999	375	-314
817	376	-422
959	377	-144
807	378	-200
923	378	-308
962	378	-433
979	378	-416
878	379	-171
952	379	-151
959	379	-169
983	379	-308
904	380	-195
910	380	-434
916	380	-170
931	380	-432
963	380	-433
985	380	-289
870	382	-432
981	382	-464
988	382	-309
856	383	-151
860	383	-443
949	384	-165
808	385	-468
906	385	-170
877	387	-433
992	387	-313
820	388	-453
879	389	-432
960	390	-115
891	391	-431
818	392	-453
961	392	-414
947	393	-308
961	393	-414
988	393	-281
907	394	-452
914	394	-426
940	394	-416
900	395	-162
955	395	-303
883	397	-193
863	398	-164
959	398	-326
961	398	-247
860	399	-447
979	400	-297
989	400	-451
860	402	-180
957	404	-302
961	404	-294
987	404	-438
948	405	-158
955	405	-445
955	405	-445
987	405	-292
838	406	-472
972	406	-165
921	407	-423
942	410	-300
960	410	-308
992	410	-184
995	410	-290
976	412	-210
862	413	-468
921	413	-473
925	413	-458
972	413	-210
977	413	-287
890	414	-169
951	414	-181
990	414	-283
807	415	-445
898	415	-145
979	415	-173
1000	415	-429
913	416	-299
896	417	-460
912	418	-438
920	418	-298
818	419	-179
826	419	-221
848	420	-470
870	420	-443
963	420	-301
991	420	-236
993	420	-430
815	421	-264
900	422	-154
860	423	-202
949	423	-302
997	423	-224
966	424	-289
915	425	-220
917	425	-184
932	425	-294
937	427	-427
940	428	-298
984	428	-283
907	429	-428
850	430	-180
871	430	-161
872	430	-245
883	430	-449
967	430	-299
990	430	-467
998	430	-178
962	431	-295
976	431	-432
813	432	-449
845	432	-175
874	432	-178
949	434	-183
979	434	-294
942	435	-235
954	435	-420
955	435	-176
914	436	-472
962	436	-295
801	438	-453
829	438	-188
896	439	-168
854	440	-463
939	440	-320
956	440	-177
970	440	-457
809	442	-178
848	442	-461
960	442	-425
980	443	-170
984	443	-430
940	444	-432
950	444	-235
983	444	-231
925	445	-306
930	445	-316
930	445	-316
953	446	-186
955	446	-303
955	446	-427
811	447	-454
966	447	-426
922	448	-479
970	448	-427
988	448	-243
988	448	-244
934	451	-435
985	452	-216
995	452	-297
997	452	-298
871	453	-480
880	454	-154
922	454	-474
970	454	-462
994	454	-313
834	456	-152
986	456	-177
820	457	-179
844	457	-263
928	457	-304
934	458	-468
993	458	-302
856	459	-452
897	459	-179
834	460	-159
845	460	-165
946	460	-443
873	461	-417
930	461	-298
938	461	-446
941	461	-446
946	461	-443
836	462	-465
956	462	-322
978	462	-179
884	463	-490
936	463	-450
938	463	-239
946	463	-443
976	463	-304
985	463	-179
902	464	-183
910	464	-309
962	464	-453
967	464	-186
998	465	-210
861	466	-274
870	466	-440
889	466	-437
975	466	-420
829	467	-454
870	467	-481
906	467	-438
956	468	-439
840	470	-179
934	470	-160
940	470	-302
971	470	-175
983	470	-423
998	470	-221
887	471	-188
919	471	-319
999	471	-436
887	472	-186
898	472	-465
898	472	-462
883	473	-438
896	473	-190
914	473	-461
966	473	-467
976	473	-419
835	474	-248
951	474	-303
975	474	-419
974	475	-431
975	475	-418
834	476	-254
863	476	-433
937	476	-321
978	476	-300
1000	476	-437
974	477	-419
825	478	-166
920	478	-427
977	478	-417
982	478	-293
986	478	-301
990	479	-381
814	480	-183
810	481	-470
902	481	-155
963	481	-420
983	481	-185
851	482	-456
900	483	-193
954	484	-306
818	485	-177
881	485	-477
942	485	-435
875	486	-448
881	486	-158
892	486	-187
945	486	-303
984	486	-295
984	486	-220
875	487	-448
890	487	-134
920	487	-457
952	487	-215
999	487	-183
872	488	-453
875	488	-452
892	488	-461
895	488	-199
936	488	-440
947	488	-155
952	488	-305
976	488	-235
937	489	-441
900	490	-140
910	490	-195
938	490	-173
975	490	-203
983	490	-421
890	491	-171
991	492	-300
850	493	-134
903	493	-429
991	493	-300
844	494	-484
979	494	-421
980	494	-221
840	495	-433
857	495	-254
865	495	-484
953	495	-420
974	495	-178
802	496	-240
865	496	-484
886	496	-245
912	496	-158
844	497	-433
914	498	-474
941	498	-186
912	500	-173
955	500	-423
955	500	-413
985	500	-437
992	500	-412
974	501	-193
938	502	-307
957	502	-252
928	503	-454
950	503	-307
825	504	-492
963	504	-421
984	504	-428
850	505	-482
850	505	-482
865	505	-484
921	505	-466
974	505	-135
805	506	-440
884	506	-200
941	506	-446
982	506	-300
839	507	-442
914	507	-307
924	507	-307
858	508	-454
912	508	-157
976	508	-171
981	509	-295
982	509	-174
876	510	-147
890	510	-483
908	510	-150
989	510	-296
857	511	-488
890	511	-163
949	511	-258
972	511	-275
990	511	-169
934	512	-308
950	512	-257
957	512	-297
979	512	-195
966	513	-410
975	513	-299
874	515	-480
934	515	-426
952	515	-255
957	515	-301
970	515	-222
982	515	-191
954	517	-254
832	518	-191
834	518	-61
854	519	-485
902	519	-163
957	519	-253
819	520	-475
875	520	-244
936	520	-195
945	520	-301
960	520	-438
990	520	-295
993	520	-407
996	520	-229
823	522	-427
837	522	-449
858	522	-457
867	523	-160
903	523	-182
971	523	-480
988	523	-288
880	524	-240
968	524	-289
980	524	-296
965	525	-443
977	526	-212
877	527	-166
878	527	-419
982	528	-296
992	528	-420
825	532	-220
909	532	-242
863	533	-459
872	533	-187
898	533	-239
966	533	-296
970	533	-294
995	533	-418
953	534	-449
975	534	-220
816	535	-452
964	536	-296
993	536	-409
856	537	-181
842	538	-494
892	539	-190
856	540	-485
876	540	-178
896	540	-471
901	540	-471
892	541	-456
866	544	-215
894	544	-195
982	544	-290
984	544	-310
871	545	-184
898	545	-309
930	545	-488
987	545	-169
976	546	-297
896	547	-192
935	547	-185
865	548	-246
885	548	-317
957	548	-192
943	549	-307
805	550	-452
876	550	-460
909	550	-325
950	550	-308
962	550	-228
908	552	-331
967	552	-182
967	553	-192
975	553	-295
990	553	-446
807	554	-488
939	554	-307
988	554	-292
827	555	-185
844	555	-460
855	555	-176
990	555	-291
994	555	-295
896	556	-172
998	556	-289
822	557	-189
877	557	-253
888	557	-470
974	557	-420
810	558	-404
810	558	-424
935	558	-303
969	558	-423
964	559	-296
815	560	-466
831	560	-466
893	560	-246
951	560	-219
986	560	-416
905	561	-490
929	561	-316
979	561	-228
829	562	-210
829	562	-242
982	562	-307
894	563	-245
902	563	-160
915	563	-321
960	563	-303
996	563	-415
900	564	-472
858	565	-232
970	565	-285
822	566	-156
900	566	-473
915	566	-217
832	567	-196
980	568	-294
970	569	-440
807	570	-460
831	570	-471
934	570	-183
940	570	-454
980	570	-290
852	573	-178
913	573	-223
995	574	-403
841	575	-460
884	575	-470
913	575	-225
920	575	-458
986	575	-118
868	576	-423
976	576	-433
980	576	-292
887	578	-406
892	578	-459
817	580	-450
822	580	-461
843	580	-451
850	580	-136
880	580	-418
894	580	-153
915	580	-157
947	580	-306
949	580	-298
978	580	-416
993	580	-285
938	581	-315
950	581	-300
963	581	-289
981	581	-298
842	582	-451
879	582	-419
918	582	-326
949	582	-302
897	583	-212
919	583	-157
979	583	-183
962	584	-298
842	585	-451
842	585	-451
843	585	-451
948	585	-115
955	585	-288
978	585	-392
842	586	-451
842	586	-451
898	586	-410
992	586	-456
836	588	-198
846	588	-170
880	588	-166
959	588	-201
823	589	-464
862	590	-175
875	590	-152
894	590	-171
964	590	-186
846	591	-465
861	591	-467
914	591	-302
932	591	-295
939	591	-425
882	592	-206
910	592	-204
916	592	-303
968	592	-200
894	593	-219
852	595	-209
852	595	-209
978	595	-327
802	596	-182
820	596	-181
886	596	-470
961	596	-191
959	597	-303
975	597	-194
836	598	-251
992	598	-343
812	599	-235
818	599	-223
846	599	-429
850	599	-436
905	599	-241
826	600	-175
880	600	-215
910	600	-220
938	600	-136
942	600	-402
943	600	-198
972	600	-423
989	600	-210
990	600	-393
849	601	-457
936	601	-446
963	601	-392
932	603	-305
965	603	-442
806	605	-163
922	605	-137
985	605	-384
830	607	-400
840	607	-219
969	608	-452
932	609	-424
998	610	-390
805	611	-457
987	611	-390
853	613	-397
965	613	-171
965	613	-168
815	614	-452
936	614	-199
955	614	-437
815	615	-186
924	615	-468
935	615	-137
940	615	-135
822	616	-186
864	616	-125
899	617	-453
900	617	-332
900	617	-337
972	617	-444
888	618	-143
920	618	-77
923	618	-361
894	619	-105
926	619	-410
835	620	-414
847	620	-185
860	620	-396
894	620	-122
975	620	-165
821	621	-89
910	621	-337
910	621	-340
955	621	-352
861	622	-198
992	622	-312
852	623	-119
858	623	-117
807	624	-459
870	624	-122
899	624	-119
992	624	-390
863	625	-228
900	625	-450
903	625	-419
924	625	-86
867	626	-120
844	627	-132
893	627	-148
877	628	-126
890	628	-116
890	628	-113
927	628	-112
967	629	-391
835	630	-99
900	630	-419
901	630	-443
904	630	-170
941	630	-358
995	630	-415
835	631	-189
841	631	-386
977	631	-380
997	631	-294
878	632	-461
948	632	-417
801	633	-78
910	633	-164
943	633	-420
904	634	-113
827	635	-170
833	635	-130
840	635	-461
840	635	-461
842	635	-459
849	635	-129
984	636	-120
815	637	-92
837	637	-459
851	637	-379
878	637	-391
929	637	-111
938	637	-350
954	637	-391
836	638	-459
836	638	-459
980	638	-462
906	639	-102
977	639	-391
801	640	-475
863	640	-392
865	640	-459
882	640	-380
831	641	-459
845	641	-465
925	641	-110
929	641	-102
997	641	-413
839	642	-46
841	642	-160
860	642	-198
870	642	-207
931	643	-124
825	644	-194
834	644	-450
990	644	-137
861	645	-384
871	645	-421
905	645	-133
931	645	-354
980	645	-278
819	646	-186
856	646	-373
922	646	-375
902	647	-198
942	647	-121
994	647	-310
848	648	-109
821	649	-149
830	649	-451
990	649	-120
838	650	-158
869	650	-424
820	652	-192
929	652	-328
930	652	-447
925	653	-464
930	653	-101
960	653	-460
848	654	-118
872	654	-459
816	655	-93
940	655	-94
811	656	-142
819	656	-435
992	656	-286
821	657	-99
830	658	-443
860	658	-118
874	658	-101
985	659	-381
910	660	-115
936	660	-416
922	661	-375
982	661	-135
807	662	-113
988	662	-283
862	663	-199
935	663	-118
961	663	-114
942	664	-473
802	665	-96
989	665	-283
852	666	-364
891	666	-451
977	666	-400
988	667	-114
807	668	-107
936	668	-428
942	668	-424
819	669	-96
840	669	-431
910	669	-136
924	669	-101
988	669	-279
816	670	-170
840	670	-190
859	670	-134
872	670	-451
872	670	-451
824	672	-438
836	672	-467
852	672	-390
925	672	-338
879	674	-104
970	674	-145
883	675	-189
822	676	-188
868	676	-189
898	676	-458
989	676	-141
812	677	-112
833	677	-126
861	677	-460
918	680	-462
992	681	-268
823	682	-470
919	682	-121
815	683	-106
855	683	-86
935	683	-127
802	684	-120
950	684	-112
867	685	-103
952	685	-149
985	685	-274
995	685	-275
895	686	-460
930	686	-137
813	687	-102
880	687	-94
934	687	-121
814	688	-104
893	688	-458
933	688	-123
865	690	-98
910	690	-127
917	690	-114
845	692	-465
800	693	-455
803	693	-164
810	693	-450
938	695	-117
920	696	-127
843	700	-95
858	700	-360
943	700	-138
930	701	-125
826	702	-122
870	704	-175
935	704	-116
824	705	-145
970	705	-117
855	706	-97
856	706	-464
841	707	-165
809	708	-172
813	708	-126
993	709	-142
841	710	-462
843	710	-94
912	712	-464
800	713	-138
857	714	-132
806	715	-174
986	717	-130
929	718	-461
917	719	-111
809	720	-165
844	720	-468
907	722	-142
815	725	-144
863	725	-114
920	725	-140
960	727	-148
885	728	-143
922	728	-460
840	730	-466
893	730	-135
850	731	-138
858	731	-188
834	733	-171
877	735	-143
962	735	0
830	739	-173
874	740	-122
959	740	-117
893	750	-171
963	750	-136
965	750	-111
900	753	-135
842	755	-132
854	755	-243
884	757	-142
913	757	-144
934	758	-138
972	759	-143
849	765	-297
862	766	-158
950	766	-87
950	770	-118
843	772	-122
965	775	-136
973	775	-146
820	778	-157
809	780	-340
942	780	-149
843	782	-290
895	786	-145
874	787	-322
960	788	-148
852	790	-297
940	790	-134
970	790	-135
889	792	-218
975	792	-132
945	793	-151
990	793	-138
956	795	-346
940	797	-309
878	799	-121
828	801	-273
842	802	-320
940	804	-124
960	805	-107
876	807	-272
908	807	-270
908	807	-270
810	808	-319
853	808	-284
912	808	-261
853	810	-289
951	810	-267
985	811	-266
888	812	-291
801	814	-49
827	814	-313
871	814	-351
871	814	-351
897	816	-263
930	816	-262
944	816	-294
864	817	-280
850	819	-293
866	819	-253
865	820	-356
896	820	-276
974	820	-252
814	821	-304
867	821	-282
942	821	-273
891	822	-419
930	822	-296
934	822	-267
909	823	-272
945	823	-284
847	825	-276
867	825	-295
865	827	-272
801	829	-290
869	829	-277
874	829	-293
882	829	-260
811	830	-258
877	830	-143
998	830	-257
880	831	-351
972	831	-246
885	832	-278
968	832	-245
838	834	-272
915	834	-296
863	835	-269
895	835	-265
969	835	-240
986	835	-251
990	835	-273
801	836	-291
824	836	-275
827	837	-260
987	837	-232
871	838	-270
933	839	-279
801	840	-289
832	840	-261
822	841	-291
831	841	-348
804	842	-273
842	842	-291
968	842	-250
993	843	-271
874	845	-257
988	845	-243
900	846	-287
800	847	-172
868	847	-347
868	847	-347
883	847	-268
929	847	-273
818	848	-268
825	850	-275
885	850	-293
824	854	-117
977	854	-348
802	855	-238
841	855	-325
950	856	-255
970	856	-258
973	857	-246
903	858	-293
980	858	-250
804	861	-292
942	862	-236
853	865	-279
922	866	-245
933	866	-251
979	866	-234
907	869	-313
943	874	-264
857	875	-284
857	875	-276
907	876	-264
938	876	-288
938	877	-253
949	878	-88
830	883	-286
800	885	-207
877	885	-333
855	886	-290
889	887	-233
931	890	-344
960	890	-250
800	891	-212
847	892	-277
879	892	-244
880	892	-258
900	892	-281
922	892	-92
980	895	-250
901	897	-245
908	897	-244
908	897	-246
910	897	-232
910	897	-232
825	898	-290
884	898	-246
957	898	-237
918	899	-230
953	899	-244
924	900	-258
850	902	-264
847	904	-243
905	904	-273
850	905	-240
900	905	-226
998	905	-239
941	906	-254
923	907	-147
935	907	-220
936	907	-246
900	908	-244
840	910	-235
874	910	-302
879	910	-227
895	910	-255
930	910	-250
990	911	-229
817	912	-322
955	913	-223
938	914	-272
985	914	-228
896	915	-245
806	917	-210
911	917	-244
879	918	-227
910	918	-258
830	919	-243
943	919	-236
840	920	-301
980	920	-238
970	922	-244
966	923	-250
970	924	-236
978	924	-239
925	925	-231
988	925	-234
870	930	-270
879	930	-227
952	930	-249
920	931	-231
860	935	-200
990	935	-210
998	935	-226
820	937	-290
800	938	-299
915	938	-245
863	940	-200
865	940	-279
960	945	-258
810	946	-306
950	951	-245
810	952	-302
885	957	-199
890	959	-181
970	960	-245
860	961	-234
840	963	-255
880	969	-207
930	973	-250
985	975	-250
853	984	-253
974	1000	-223
820	1036	-90
839	1060	-82

## Sheet: Batallones_10_x
x	y	z
619	400	-466
696	400	-356
979	400	-297
989	400	-451
1000	400	0
1037	400	-148
1076	400	-403
1328	400	-236
1370	400	-231
1387	400	-200
1098	401	-167
1315	401	-241
1316	401	-240
1318	401	-240
1319	401	-243
641	402	-147
860	402	-180
1127	402	-253
1181	402	-169
1209	402	-251
1225	402	-257
1312	402	-241
1314	402	-242
1480	402	-189
1032	403	-162
1089	403	-307
1191	403	-154
1268	403	-267
1330	403	-234
1332	403	-235
1332	403	-233
1364	403	-204
1427	403	-200
697	404	-435
760	404	-451
957	404	-302
961	404	-294
987	404	-438
1041	404	-307
1161	404	-168
1196	404	-269
1204	404	-285
1211	404	-281
1327	404	-237
1482	404	-189
761	405	-451
948	405	-158
955	405	-445
955	405	-445
987	405	-292
1012	405	-277
1030	405	-307
1083	405	-312
1157	405	-150
1164	405	-179
1179	405	-452
1329	405	-239
1329	405	-240
1423	405	-199
647	406	-149
722	406	-367
744	406	-436
838	406	-472
972	406	-165
1039	406	-149
1324	406	-234
1467	406	-292
921	407	-423
1016	407	-316
1096	407	-186
1352	407	-237
1377	407	-197
1464	407	-194
655	408	-164
1465	408	-290
1065	409	-212
1129	409	-261
1182	409	-143
1275	409	-286
942	410	-300
960	410	-308
992	410	-184
995	410	-290
1008	410	-292
1099	410	-96
1102	410	-201
1120	410	-287
1146	410	-311
1380	410	-186
1398	410	-299
1156	411	-260
1256	411	-290
1549	411	-175
609	412	-159
976	412	-210
1004	412	-278
1086	412	-395
1321	412	-228
1407	412	-218
703	413	-356
862	413	-468
921	413	-473
925	413	-458
972	413	-210
977	413	-287
1053	413	-291
1065	413	-262
1104	413	-261
1372	413	-303
683	414	-149
890	414	-169
951	414	-181
990	414	-283
1250	414	-229
1304	414	-222
1312	414	-218
1507	414	-181
807	415	-445
898	415	-145
979	415	-173
1000	415	-429
1130	415	-256
1144	415	-176
1203	415	-246
1325	415	-232
1333	415	-220
1380	415	-190
765	416	-373
913	416	-299
1012	416	-192
1264	416	-224
896	417	-460
1008	417	-298
1029	417	-277
1124	417	-284
1176	417	-199
1195	417	-241
1322	417	-313
1377	417	-298
609	418	-152
912	418	-438
920	418	-298
1088	418	-396
1229	418	-265
1429	418	-216
818	419	-179
826	419	-221
1083	419	-405
1090	419	-204
1334	419	-225
638	420	-160
848	420	-470
870	420	-443
963	420	-301
991	420	-236
993	420	-430
1013	420	-191
1023	420	-190
1039	420	-251
1042	420	-298
1132	420	-192
1245	420	-220
1338	420	-226
1361	420	-226
815	421	-264
1132	421	-198
1282	421	-213
1334	421	-231
675	422	-156
900	422	-154
1020	422	-406
1022	422	-427
1061	422	-225
1187	422	-210
1329	422	-232
685	423	-452
738	423	-371
783	423	-458
860	423	-202
949	423	-302
997	423	-224
1085	423	-400
1101	423	-391
1380	423	-297
1480	423	-185
1541	423	-172
966	424	-289
1002	424	-418
1213	424	-269
1358	424	-310
1368	424	-272
1473	424	-199
915	425	-220
917	425	-184
932	425	-294
1000	425	-158
1011	425	-170
1070	425	-165
1117	425	-294
1388	425	-307
1439	425	-194
649	426	-141
1041	426	-303
937	427	-427
1065	427	-419
1088	427	-197
1096	427	-198
1105	427	-191
1129	427	-398
1147	427	-396
1304	427	-214
675	428	-148
688	428	-135
940	428	-298
984	428	-283
1051	428	-418
1114	428	-252
1356	428	-216
1392	428	-285
1456	428	-185
682	429	-155
907	429	-428
1073	429	-448
1099	429	-207
1184	429	-462
1400	429	-184
1423	429	-195
686	430	-325
850	430	-180
871	430	-161
872	430	-245
883	430	-449
967	430	-299
990	430	-467
998	430	-178
1060	430	-266
1107	430	-188
1116	430	-395
1179	430	-187
1215	430	-260
1335	430	-271
1341	430	-234
1354	430	-227
1377	430	-216
1551	430	-179
653	431	-143
694	431	-410
962	431	-295
976	431	-432
1085	431	-242
1086	431	-198
1200	431	-307
1349	431	-228
1350	431	-228
1352	431	-206
1363	431	-166
1461	431	-203
1496	431	-190
703	432	-423
813	432	-449
845	432	-175
874	432	-178
1078	432	-406
1095	432	-188
1101	432	-304
1225	432	-141
1398	432	-203
1516	432	-182
661	433	-320
678	433	-11
1046	433	-240
1075	433	-221
1112	433	-214
949	434	-183
979	434	-294
1091	434	-295
1126	434	-196
1247	434	-224
1531	434	-176
715	435	-378
718	435	-321
734	435	-379
942	435	-235
954	435	-420
955	435	-176
1028	435	-194
1104	435	-179
609	436	-152
914	436	-472
962	436	-295
1014	436	-215
1042	436	-425
1064	436	-223
1071	436	-449
1090	436	-185
1090	436	-402
1231	436	-273
1359	436	-213
1469	436	-197
736	437	-377
1030	437	-407
1041	437	-274
1198	437	-256
801	438	-453
829	438	-188
1045	438	-297
1058	438	-228
1068	438	-224
1134	438	-170
1165	438	-189
1207	438	-188
1264	438	-154
896	439	-168
1092	439	-204
1342	439	-232
1363	439	-285
615	440	-156
854	440	-463
939	440	-320
956	440	-177
970	440	-457
1005	440	-285
1014	440	-267
1077	440	-217
1082	440	-192
1190	440	-315
1190	440	-315
1269	440	-315
1386	440	-304
1434	440	-196
1474	440	-191
1541	440	-171
684	441	-333
1364	441	-229
1380	441	-217
1500	441	-101
607	442	-139
809	442	-178
848	442	-461
960	442	-425
1230	442	-164
1246	442	-248
749	443	-355
980	443	-170
984	443	-430
1039	443	-271
1074	443	-186
1089	443	-393
1118	443	-191
1172	443	-394
1192	443	-278
1214	443	-312
940	444	-432
950	444	-235
983	444	-231
1065	444	-311
1100	444	-186
1382	444	-177
1400	444	-295
925	445	-306
930	445	-316
930	445	-316
1036	445	-275
1046	445	-274
1090	445	-284
1211	445	-154
1349	445	-301
1458	445	-199
799	446	-470
953	446	-186
955	446	-303
955	446	-427
1033	446	-305
1069	446	-450
1348	446	-217
1348	446	-301
1378	446	-308
1409	446	-263
811	447	-454
966	447	-426
1047	447	-300
1096	447	-213
1103	447	-157
1107	447	-185
1164	447	-254
1201	447	-168
1208	447	-145
1328	447	-214
1349	447	-229
1366	447	-295
1393	447	-182
645	448	-372
922	448	-479
970	448	-427
988	448	-243
988	448	-244
1120	448	-267
1138	448	-244
1366	448	-215
1170	449	-242
1242	449	-184
1359	449	-227
1370	449	-246
614	450	-146
711	450	-17
728	450	-461
1000	450	-284
1018	450	-217
1040	450	-177
1070	450	-185
1070	450	-184
1104	450	-203
1322	450	-304
1351	450	-221
1352	450	-323
1377	450	-186
649	451	-370
651	451	-370
658	451	-369
934	451	-435
1040	451	-276
1054	451	-289
1122	451	-207
1345	451	-231
985	452	-216
995	452	-297
997	452	-298
1012	452	-212
1041	452	-217
1111	452	-191
1230	452	-296
1280	452	-294
1283	452	-293
871	453	-480
1040	453	-273
1337	453	-224
880	454	-154
922	454	-474
970	454	-462
994	454	-313
1138	454	-246
1343	454	-229
1346	454	-223
1348	454	-282
1096	455	-255
1142	455	-261
1290	455	-329
834	456	-152
986	456	-177
1007	456	-409
1009	456	-321
1047	456	-276
1076	456	-277
1096	456	-194
1278	456	-293
1312	456	-315
1342	456	-169
1354	456	-222
1530	456	-175
639	457	-293
666	457	-327
789	457	-201
820	457	-179
844	457	-263
928	457	-304
1029	457	-432
1035	457	-209
1258	457	-285
1347	457	-224
648	458	-132
708	458	-357
934	458	-468
993	458	-302
1161	458	-255
1162	458	-267
1382	458	-220
1467	458	-187
728	459	-349
856	459	-452
897	459	-179
1108	459	-256
1268	459	-226
1311	459	-305
1373	459	-220
699	460	-7
700	460	-430
720	460	-333
834	460	-159
845	460	-165
946	460	-443
1010	460	-418
1018	460	-193
1036	460	-216
1080	460	-214
1080	460	-216
1088	460	-196
1115	460	-292
1160	460	-256
1195	460	-179
1216	460	-238
1317	460	-307
1370	460	-290
873	461	-417
930	461	-298
938	461	-446
941	461	-446
946	461	-443
1028	461	-288
1350	461	-229
1554	461	-181
791	462	-349
836	462	-465
956	462	-322
978	462	-179
1000	462	-289
1010	462	-376
1052	462	-227
1068	462	-217
1108	462	-198
1195	462	-181
1270	462	-225
1353	462	-221
1362	462	-280
1367	462	-225
632	463	-285
632	463	-285
656	463	-323
782	463	-406
884	463	-490
936	463	-450
938	463	-239
946	463	-443
976	463	-304
985	463	-179
1340	463	-296
1354	463	-286
902	464	-183
910	464	-309
962	464	-453
967	464	-186
1024	464	-282
1291	464	-330
1293	464	-230
1350	464	-229
770	465	-470
998	465	-210
1000	465	-289
1002	465	-421
1030	465	-166
1310	465	-322
861	466	-274
870	466	-440
889	466	-437
975	466	-420
1020	466	-285
1037	466	-281
1037	466	-281
1064	466	-168
1124	466	-164
1259	466	-327
1346	466	-228
1355	466	-283
1366	466	-225
623	467	-155
638	467	-140
639	467	-300
829	467	-454
870	467	-481
906	467	-438
1110	467	-273
1359	467	-280
1402	467	-214
770	468	-479
956	468	-439
1072	468	-190
1093	468	-262
1349	468	-220
1364	468	-280
1079	469	0
1123	469	-255
1282	469	-278
1357	469	-282
1362	469	-225
651	470	-321
655	470	-332
733	470	-348
840	470	-179
934	470	-160
940	470	-302
971	470	-175
983	470	-423
998	470	-221
1012	470	-288
1256	470	-258
1424	470	-215
651	471	-334
887	471	-188
919	471	-319
999	471	-436
1038	471	-291
1040	471	-419
1193	471	-156
1405	471	-218
1479	471	-213
887	472	-186
898	472	-465
898	472	-462
1010	472	-439
1036	472	-276
1304	472	-274
1367	472	-279
1368	472	-214
883	473	-438
896	473	-190
914	473	-461
966	473	-467
976	473	-419
1059	473	-277
1196	473	-172
1247	473	-156
1306	473	-340
1316	473	-334
835	474	-248
951	474	-303
975	474	-419
1020	474	-411
1032	474	-263
1156	474	-263
1247	474	-218
1294	474	-227
1348	474	-278
1360	474	-225
1375	474	-277
629	475	-164
974	475	-431
975	475	-418
1256	475	-230
1371	475	-280
1405	475	-219
834	476	-254
863	476	-433
937	476	-321
978	476	-300
1000	476	-437
1043	476	-414
1064	476	-316
1112	476	-255
1226	476	-272
1334	476	-231
1357	476	-226
1455	476	-181
1553	476	-200
669	477	-165
974	477	-419
1043	477	-247
1089	477	-308
1108	477	-272
1307	477	-188
1350	477	-291
1360	477	-218
1378	477	-282
732	478	-340
825	478	-166
920	478	-427
977	478	-417
982	478	-293
986	478	-301
1061	478	-274
1106	478	-257
1130	478	-260
1210	478	-295
1250	478	-234
1295	478	-319
1346	478	-297
990	479	-381
1021	479	-411
1259	479	-266
1354	479	-227
1406	479	-234
667	480	-460
814	480	-183
1022	480	-235
1082	480	-263
1096	480	-257
1290	480	-330
1352	480	-279
1358	480	-277
1568	480	-197
659	481	-157
810	481	-470
902	481	-155
963	481	-420
983	481	-185
1053	481	-278
1096	481	-230
1097	481	-258
1299	481	-279
1326	481	-169
1379	481	-282
1383	481	-223
851	482	-456
1102	482	-200
1145	482	-181
1247	482	-214
1305	482	-325
701	483	-445
900	483	-193
1002	483	-481
1312	483	-323
1351	483	-229
665	484	-156
729	484	-331
954	484	-306
1026	484	-400
1051	484	-276
1130	484	-383
1342	484	-225
818	485	-177
881	485	-477
942	485	-435
1014	485	-284
1021	485	-403
1067	485	-219
1190	485	-240
1346	485	-229
627	486	-162
627	486	-162
627	486	-162
875	486	-448
881	486	-158
892	486	-187
945	486	-303
984	486	-295
984	486	-220
1007	486	-480
1017	486	-282
1210	486	-160
1286	486	-226
1325	486	-167
1350	486	-279
875	487	-448
890	487	-134
920	487	-457
952	487	-215
999	487	-183
1055	487	-294
1160	487	-260
611	488	-162
691	488	-340
872	488	-453
875	488	-452
892	488	-461
895	488	-199
936	488	-440
947	488	-155
952	488	-305
976	488	-235
1000	488	-286
1268	488	-232
1314	488	-330
1368	488	-192
639	489	-320
937	489	-441
1044	489	-475
1076	489	-304
1095	489	-265
1147	489	-255
1325	489	-173
1368	489	-219
1546	489	-200
605	490	-163
678	490	-340
900	490	-140
910	490	-195
938	490	-173
975	490	-203
983	490	-421
1007	490	-403
1007	490	-403
1024	490	-275
1080	490	-289
1130	490	-248
1253	490	-304
1260	490	-234
1267	490	-301
1320	490	-310
1421	490	-214
1550	490	-198
632	491	-163
680	491	-162
890	491	-171
1381	491	-235
991	492	-300
1016	492	-406
1109	492	-252
1270	492	-290
850	493	-134
903	493	-429
991	493	-300
1148	493	-242
1243	493	-300
1564	493	-180
743	494	-327
760	494	-460
844	494	-484
979	494	-421
980	494	-221
1064	494	-313
1238	494	-313
1576	494	-182
1579	494	-182
840	495	-433
857	495	-254
865	495	-484
953	495	-420
974	495	-178
1062	495	-276
1560	495	-200
1560	495	-186
802	496	-240
865	496	-484
886	496	-245
912	496	-158
1019	496	-408
1045	496	-299
1061	496	-222
1190	496	-316
1337	496	-222
844	497	-433
1025	497	-289
1033	497	-274
1033	497	-167
1055	497	-170
1217	497	-239
1255	497	-292
1261	497	-237
1355	497	-280
1369	497	-213
1553	497	-194
740	498	-347
914	498	-474
941	498	-186
1032	498	-396
1095	498	-252
1099	498	-220
1196	498	-257
1556	498	-200
1092	499	-258
1273	499	-204
1449	499	-189
912	500	-173
955	500	-423
955	500	-413
985	500	-437
992	500	-412
1077	500	-166
1092	500	-254
1092	500	-254
1280	500	-178
1307	500	-285
1361	500	-211
1380	500	-198
1533	500	-182
1543	500	-200
1554	500	-202
1581	500	-189
1586	500	-180
650	501	-335
974	501	-193
1018	501	-447
1080	501	-401
1147	501	-256
1262	501	-286
1392	501	-213
1403	501	-187
1583	501	-189
938	502	-307
957	502	-252
1006	502	-173
1097	502	-390
1315	502	-269
1374	502	-187
677	503	-331
928	503	-454
950	503	-307
1113	503	-163
1130	503	-145
1137	503	-190
1262	503	-218
825	504	-492
963	504	-421
984	504	-428
1094	504	-250
1239	504	-231
1240	504	-206
1253	504	-204
1528	504	-179
850	505	-482
850	505	-482
865	505	-484
921	505	-466
974	505	-135
1050	505	-300
1055	505	-300
1065	505	-167
1090	505	-202
1113	505	-287
1115	505	-212
1120	505	-251
1125	505	-256
1568	505	-190
805	506	-440
884	506	-200
941	506	-446
982	506	-300
1072	506	-284
1087	506	-252
1380	506	-224
1407	506	-218
1444	506	-190
1532	506	-182
839	507	-442
914	507	-307
924	507	-307
1055	507	-162
1118	507	-199
1186	507	-189
1304	507	-214
1350	507	-217
1526	507	-185
1552	507	-193
1553	507	-193
1568	507	-187
858	508	-454
912	508	-157
976	508	-171
1024	508	-284
1047	508	-284
1364	508	-191
1373	508	-202
1551	508	-191
1554	508	-194
981	509	-295
982	509	-174
1065	509	-212
1450	509	-185
1547	509	-192
1553	509	-189
1554	509	-195
1554	509	-196
1554	509	-196
1554	509	-196
1573	509	-185
652	510	-343
690	510	-460
876	510	-147
890	510	-483
908	510	-150
989	510	-296
1050	510	-410
1054	510	-278
1092	510	-250
1231	510	-241
1313	510	-310
1332	510	-226
1359	510	-211
1554	510	-190
1555	510	-185
1571	510	-178
1580	510	-190
1580	510	-192
749	511	-472
857	511	-488
890	511	-163
949	511	-258
972	511	-275
990	511	-169
1119	511	-257
1184	511	-184
1554	511	-190
1556	511	-190
934	512	-308
950	512	-257
957	512	-297
979	512	-195
1229	512	-230
1255	512	-209
1317	512	-235
1325	512	-219
1360	512	-209
1550	512	-192
966	513	-410
975	513	-299
1338	513	-184
1373	513	-226
1581	513	-184
654	514	-360
683	514	-334
1004	514	-238
1010	514	-293
1106	514	-162
1330	514	-206
1343	514	-228
1388	514	-221
1526	514	-183
874	515	-480
934	515	-426
952	515	-255
957	515	-301
970	515	-222
982	515	-191
1053	515	-392
1078	515	-270
1243	515	-223
1564	515	-188
1564	515	-189
1564	515	-187
675	516	-469
1525	516	-191
1585	516	-185
678	517	-469
954	517	-254
1536	517	-184
1577	517	-184
629	518	-165
644	518	-415
677	518	-469
832	518	-191
834	518	-61
1041	518	-237
1046	518	-219
1047	518	-400
1056	518	-391
1080	518	-383
1268	518	-288
1386	518	-207
1477	518	-193
854	519	-485
902	519	-163
957	519	-253
675	520	-362
681	520	-469
682	520	-469
682	520	-469
819	520	-475
875	520	-244
936	520	-195
945	520	-301
960	520	-438
990	520	-295
993	520	-407
996	520	-229
1042	520	-190
1051	520	-397
1115	520	-190
1162	520	-268
1219	520	-201
1230	520	-207
1582	520	-187
674	521	-469
1072	521	-235
1421	521	-197
1535	521	-190
823	522	-427
837	522	-449
858	522	-457
1056	522	-267
1080	522	-387
1099	522	-261
1112	522	-311
1122	522	-311
1136	522	-177
1138	522	-285
1310	522	-320
1320	522	-222
1499	522	-183
1595	522	-183
867	523	-160
903	523	-182
971	523	-480
988	523	-288
1010	523	-284
1018	523	-304
1189	523	-278
1206	523	-303
1242	523	-235
1289	523	-291
1298	523	-227
1563	523	-190
660	524	-338
880	524	-240
968	524	-289
980	524	-296
1061	524	-384
1462	524	-184
1605	524	-183
633	525	-327
681	525	-469
965	525	-443
1042	525	-199
1043	525	-402
1046	525	-397
1051	525	-397
1058	525	-295
1064	525	-229
1090	525	-258
1096	525	-208
1157	525	-197
1165	525	-170
1335	525	-205
1577	525	-189
681	526	-469
725	526	-329
750	526	-375
977	526	-212
1074	526	-403
1126	526	-253
1180	526	-173
1302	526	-220
877	527	-166
878	527	-419
1083	527	-260
1101	527	-263
1126	527	-200
1296	527	-220
1303	527	-172
982	528	-296
992	528	-420
1035	528	-290
1048	528	-272
1118	528	-186
1328	528	-219
1342	528	-186
1579	528	-187
698	529	-320
751	529	-460
784	529	-396
1080	529	-233
1199	529	-165
1304	529	-224
1330	529	-236
646	530	-435
673	530	-469
1030	530	-415
1033	530	-413
1050	530	-397
1112	530	-196
1113	530	-270
1118	530	-200
1128	530	-201
1136	530	-189
1223	530	-209
1275	530	-290
1366	530	-200
1367	530	-210
753	531	-372
1070	531	-272
1226	531	-287
1382	531	-192
1419	531	-200
825	532	-220
909	532	-242
1060	532	-265
1060	532	-387
1077	532	-299
1081	532	-277
1085	532	-274
1153	532	-268
1303	532	-328
613	533	-170
863	533	-459
872	533	-187
898	533	-239
966	533	-296
970	533	-294
995	533	-418
1035	533	-408
1057	533	-404
1140	533	-261
1364	533	-213
1484	533	-183
1583	533	-184
767	534	-463
953	534	-449
975	534	-220
1090	534	-381
1191	534	-439
1312	534	-222
1383	534	-201
673	535	-469
793	535	-411
816	535	-452
1017	535	-420
1060	535	-215
1123	535	-249
1138	535	-191
1324	535	-215
1413	535	-200
1527	535	-190
745	536	-370
964	536	-296
993	536	-409
1076	536	-271
1118	536	-193
856	537	-181
1023	537	-232
842	538	-494
1076	538	-219
1235	538	-223
1562	538	-178
892	539	-190
1015	539	-404
1043	539	-275
1069	539	-390
1096	539	-222
1148	539	-245
1203	539	-201
1512	539	-193
725	540	-352
770	540	-465
780	540	-460
856	540	-485
876	540	-178
896	540	-471
901	540	-471
1010	540	-229
1062	540	-60
1071	540	-233
1074	540	-275
1083	540	-379
1100	540	-220
1103	540	-209
1125	540	-302
1160	540	-177
1170	540	-170
1188	540	-317
1315	540	-219
892	541	-456
1180	541	-171
1284	541	-217
1289	541	-217
1358	541	-228
1497	541	-178
761	542	-163
773	542	-379
1189	542	-177
1208	542	-269
1377	542	-199
1069	543	-380
1105	543	-218
1188	543	-176
1300	543	-210
1340	543	-207
743	544	-225
866	544	-215
894	544	-195
982	544	-290
984	544	-310
1050	544	-263
1182	544	-171
1210	544	-239
1214	544	-273
1220	544	-232
680	545	-325
762	545	-183
871	545	-184
898	545	-309
930	545	-488
987	545	-169
1070	545	-380
1115	545	-195
1155	545	-164
1203	545	-204
1452	545	-193
1550	545	-185
976	546	-297
1071	546	-287
1097	546	-263
1328	546	-188
1472	546	-216
711	547	-460
896	547	-192
935	547	-185
1076	547	-390
1103	547	-222
1211	547	-209
1229	547	-169
865	548	-246
885	548	-317
957	548	-192
1086	548	-156
1096	548	-220
1320	548	-198
1325	548	-237
1330	548	-215
1369	548	-225
670	549	-328
707	549	-328
943	549	-307
1051	549	-281
1182	549	-182
1565	549	-171
730	550	-374
748	550	-179
805	550	-452
876	550	-460
909	550	-325
950	550	-308
962	550	-228
1006	550	-268
1035	550	-196
1045	550	-455
1117	550	-182
1120	550	-297
1178	550	-175
1178	550	-175
1280	550	-333
1289	550	-285
1318	550	-214
1367	550	-210
630	551	-173
705	551	-462
1080	551	-267
1098	551	-260
1236	551	-201
1244	551	-296
1363	551	-232
1383	551	-192
1449	551	-192
1597	551	-176
908	552	-331
967	552	-182
1370	552	-232
1383	552	-208
967	553	-192
975	553	-295
990	553	-446
1042	553	-236
1197	553	-178
1211	553	-162
1320	553	-202
1435	553	-216
1446	553	-174
779	554	-122
807	554	-488
939	554	-307
988	554	-292
1130	554	-254
1334	554	-199
1464	554	-194
1577	554	-182
656	555	-179
827	555	-185
844	555	-460
855	555	-176
990	555	-291
994	555	-295
1076	555	-291
1110	555	-181
1229	555	-170
1248	555	-173
1524	555	-191
1592	555	-176
674	556	-332
896	556	-172
998	556	-289
1102	556	-200
1114	556	-260
1114	556	-260
1370	556	-232
1459	556	-216
677	557	-150
746	557	-364
822	557	-189
877	557	-253
888	557	-470
974	557	-420
1118	557	-182
1181	557	-165
1212	557	-247
1318	557	-222
678	558	-104
810	558	-404
810	558	-424
935	558	-303
969	558	-423
1198	558	-193
1396	558	-216
964	559	-296
1128	559	-194
1177	559	-299
1218	559	-170
1274	559	-274
1465	559	-217
1532	559	-187
640	560	-430
650	560	-460
815	560	-466
831	560	-466
893	560	-246
951	560	-219
986	560	-416
1072	560	-159
1085	560	-190
1140	560	-300
1168	560	-250
1198	560	-223
1214	560	-164
1338	560	-164
1485	560	-200
1504	560	-182
1509	560	-188
905	561	-490
929	561	-316
979	561	-228
1104	561	-203
666	562	-103
780	562	-202
829	562	-210
829	562	-242
982	562	-307
1001	562	-498
1010	562	-285
1081	562	-450
1462	562	-185
1468	562	-189
705	563	-355
790	563	-146
894	563	-245
902	563	-160
915	563	-321
960	563	-303
996	563	-415
1000	563	-289
1060	563	-278
1077	563	-258
1125	563	-267
900	564	-472
1003	564	-297
1011	564	-285
1190	564	-171
1210	564	-320
1337	564	-201
1358	564	-186
1456	564	-182
1494	564	-183
787	565	-220
858	565	-232
970	565	-285
1058	565	-267
1195	565	-187
1287	565	-240
1293	565	-266
1332	565	-204
1574	565	-182
667	566	-155
711	566	-364
822	566	-156
900	566	-473
915	566	-217
610	567	-180
832	567	-196
1040	567	-278
1223	567	-304
1223	567	-304
1295	567	-210
1350	567	-227
670	568	-342
735	568	-358
980	568	-294
1105	568	-218
1109	568	-197
1189	568	-184
1213	568	-250
1218	568	-303
1218	568	-303
1240	568	-168
1308	568	-213
1579	568	-178
656	569	-107
970	569	-440
1350	569	-260
1471	569	-200
1511	569	-178
689	570	-343
738	570	-362
807	570	-460
831	570	-471
934	570	-183
940	570	-454
980	570	-290
1023	570	-277
1080	570	-264
1080	570	-264
1087	570	-224
1087	570	-222
1090	570	-304
1180	570	-314
1185	570	-218
1278	570	-273
1333	570	-207
1533	570	-185
781	571	-383
1038	571	-163
1118	571	-403
1201	571	-318
1212	571	-319
1217	571	-243
1292	571	-266
1301	571	-265
1386	571	-214
1453	571	-215
1055	572	-280
1132	572	-256
1138	572	-252
1237	572	-295
1327	572	-178
1336	572	-209
1344	572	-207
1560	572	-167
639	573	-180
792	573	-143
852	573	-178
913	573	-223
1237	573	-239
1481	573	-178
1531	573	-187
995	574	-403
1092	574	-257
1149	574	-180
1158	574	-263
1181	574	-180
1497	574	-184
1560	574	-186
640	575	-89
650	575	-354
787	575	-352
841	575	-460
884	575	-470
913	575	-225
920	575	-458
986	575	-118
1024	575	-276
1105	575	-458
1270	575	-273
1270	575	-274
1293	575	-273
1355	575	-214
1445	575	-194
1557	575	-188
1563	575	-185
868	576	-423
976	576	-433
980	576	-292
1051	576	-278
1081	576	-471
1093	576	-256
1328	576	-177
1363	576	-241
1363	576	-241
1564	576	-185
666	577	-103
768	577	-356
1048	577	-230
1073	577	-160
1119	577	-256
1193	577	-318
1219	577	-245
1235	577	-256
1275	577	-241
1531	577	-187
1563	577	-185
729	578	-178
887	578	-406
892	578	-459
1024	578	-278
1060	578	-260
1068	578	-278
1069	578	-390
1214	578	-299
1367	578	-180
1426	578	-207
671	579	-158
1140	579	-263
1165	579	-267
1204	579	-312
1491	579	-188
1562	579	-187
640	580	-397
670	580	-440
755	580	-445
762	580	-377
817	580	-450
822	580	-461
843	580	-451
850	580	-136
880	580	-418
894	580	-153
915	580	-157
947	580	-306
949	580	-298
978	580	-416
993	580	-285
1002	580	-290
1003	580	-221
1033	580	-233
1050	580	-382
1070	580	-216
1074	580	-166
1085	580	-261
1095	580	-279
1095	580	-188
1124	580	-197
1173	580	-294
1180	580	-220
1256	580	-181
1281	580	-269
1293	580	-266
1310	580	-188
1572	580	-183
793	581	-450
938	581	-315
950	581	-300
963	581	-289
981	581	-298
1082	581	-439
1194	581	-357
1255	581	-279
1431	581	-191
685	582	-340
709	582	-348
842	582	-451
879	582	-419
918	582	-326
949	582	-302
1090	582	-431
1148	582	-195
1338	582	-217
1434	582	-198
1539	582	-193
1572	582	-184
1572	582	-185
1583	582	-168
897	583	-212
919	583	-157
979	583	-183
1131	583	-297
1226	583	-299
1342	583	-241
1429	583	-212
680	584	-123
790	584	-207
962	584	-298
1461	584	-183
666	585	-134
710	585	-400
842	585	-451
842	585	-451
843	585	-451
948	585	-115
955	585	-288
978	585	-392
1063	585	-390
1185	585	-318
1256	585	-273
1262	585	-247
1262	585	-275
1338	585	-255
1419	585	-203
1511	585	-191
1537	585	-194
842	586	-451
842	586	-451
898	586	-410
992	586	-456
1251	586	-253
1344	586	-198
1534	586	-195
1534	586	-195
1083	587	-197
1108	587	-238
1134	587	-247
1205	587	-319
1221	587	-299
1277	587	-260
1295	587	-213
1350	587	-248
1526	587	-201
1537	587	-199
690	588	-399
740	588	-369
836	588	-198
846	588	-170
880	588	-166
959	588	-201
1093	588	-292
1093	588	-199
1136	588	-192
1195	588	-350
1223	588	-286
1228	588	-252
1253	588	-277
1373	588	-183
709	589	-368
823	589	-464
1386	589	-204
1524	589	-200
642	590	-175
766	590	-457
862	590	-175
875	590	-152
894	590	-171
964	590	-186
1102	590	-257
1105	590	-296
1234	590	-296
1452	590	-178
1490	590	-213
846	591	-465
861	591	-467
914	591	-302
932	591	-295
939	591	-425
1340	591	-251
1341	591	-249
1358	591	-191
609	592	-166
635	592	-406
674	592	-174
697	592	-155
882	592	-206
910	592	-204
916	592	-303
968	592	-200
1040	592	-279
1086	592	-260
1176	592	-315
1407	592	-196
1425	592	-198
1427	592	-226
1522	592	-200
894	593	-219
1050	593	-393
1529	593	-193
1529	593	-193
681	594	-154
1032	594	-281
1082	594	-202
1245	594	-270
690	595	-401
705	595	-408
735	595	-368
758	595	-373
852	595	-209
852	595	-209
978	595	-327
1180	595	-215
1210	595	-260
1327	595	-203
1345	595	-246
1368	595	-219
1470	595	-200
1560	595	-182
802	596	-182
820	596	-181
886	596	-470
961	596	-191
1042	596	-269
1194	596	-251
1398	596	-200
959	597	-303
975	597	-194
1046	597	-269
1047	597	-195
1063	597	-362
1067	597	-185
1132	597	-241
1193	597	-297
1282	597	-250
1316	597	-257
643	598	-190
836	598	-251
992	598	-343
1226	598	-252
1472	598	-196
1510	598	-182
601	599	-389
812	599	-235
818	599	-223
846	599	-429
850	599	-436
905	599	-241
1011	599	-380
1048	599	-190
826	600	-175
880	600	-215
910	600	-220
942	600	-402
943	600	-198
989	600	-210
1146	600	-242
1240	600	-267
1264	600	-266
1332	600	-203
1306	690	-265
1306	691	-265

## Sheet: Batallones_3_left
x	y	z
-415	151	-36
-411	150	-35
-408	148	-34
-420	131	-39
-407	190	-59
-415	171	-54
-415	192	-60
-430	180	-50
-418	181	-65
-430	185	-62
-435	175	-62
-436	174	-62
-425	189	-63
-421	159	-60
-414	130	-50
-414	198	-64
-423	179	-58
-431	182	-68
-401	171	-57
-404	156	-55
-417	159	-65
-423	182	-57
-441	198	-71
-417	187	-67
-419	117	-70
-409	109	-71
-408	110	-68
-440	106	-30
-427	193	-74
-420	155	-63
-457	163	-35
-459	164	-34
-455	160	-34
-457	158	-39
-460	158	-41
-456	160	-45
-458	170	-70
-459	168	-67
-444	145	-39
-424	104	-53
-409	133	-63
-465	171	-51
-416	135	-60
-432	138	-64
-427	115	-55
-427	113	-57
-433	116	-61
-411	192	-76
-414	187	-76
-412	190	-74
-425	190	-79
-440	183	-66
-444	182	-67
-425	103	-71
-425	104	-71
-461	189	-56
-445	172	-69
-415	196	-81
-409	197	-80
-460	135	-77
-458	140	-75
-459	140	-74
-455	152	-82
-432	160	-67
-426	169	-81
-428	171	-78
-440	129	-66
-405	110	-84
-403	110	-85
-434	175	-78
-439	192	-77
-427	185	-81
-447	195	-77
-440	193	-75
-420	182	-78
-460	187	-105
-458	167	-89
-444	195	-89
-444	180	-91
-444	160	-104
-444	193	-102
-444	164	-102
-444	165	-98
-443	167	-94
-443	184	-88
-440	187	-86
-436	190	-85
-430	114	-83
-428	195	-79
-422	198	-74
-416	198	-72
-412	198	-70
-408	198	-68
-429	162	-94
-438	165	-96
-440	163	-96
-427	154	-91
-422	155	-89
-400	140	-85
-403	140	-85
-420	140	-86
-459	111	-35
-401	200	-89
-401	145	-84
-403	146	-84
-411	172	-82
-405	191	-86
-411	139	-86
-411	179	-79
-413	169	-82
-420	170	-81
-412	173	-77
-422	163	-83
-418	176	-76
-456	198	-23
-405	178	-74
-406	170	-78
-414	182	-82
-450	161	-49
-428	190	-85
-425	192	-89
-407	200	-96
-435	182	-78
-439	168	-77
-432	190	-90
-448	190	-89
-451	189	-90
-445	173	-90
-448	176	-88
-480	190	-64
-480	100	-41
-425	174	-92
-437	177	-93
-439	179	-94
-447	173	-89
-445	176	-85
-500	190	-60
-440	178	-92
-452	175	-90
-513	175	-38
-525	185	-43
-477	184	-100
-445	189	-94
-443	191	-93
-452	191	-94
-446	169	-93
-448	179	-96
-440	185	-82
-450	187	-95
-448	187	-94
-433	197	-47
-435	191	-49
-409	110	-63
-458	197	-56
-459	198	-61
-458	198	-62
-459	181	-69
-419	200	-60
-421	196	-59
-498	200	-67
-412	196	-67
-416	126	-72
-424	128	-73
-411	109	-52
-410	111	-54
-454	144	-69
-435	136	-72
-436	133	-74
-436	148	-68
-435	200	-66
-463	167	-68
-468	192	-68
-478	191	-75
-462	164	-67
-459	172	-64
-456	173	-67
-455	172	-68
-457	166	-67
-458	164	-67
-459	165	-66
-463	166	-67
-478	193	-73
-454	182	-86
-429	108	-64
-481	143	-103
-487	161	-94
-489	147	-96
-441	165	-101
-449	142	-82
-442	139	-91
-475	165	-101
-466	136	-102
-468	136	-100
-452	110	-111
-444	113	-103
-466	131	-91
-467	131	-91
-414	120	-107
-466	192	-96
-439	126	-78
-456	133	-93
-465	140	-92
-463	132	-94
-462	126	-98
-464	127	-106
-469	107	-112
-464	118	-93
-462	120	-99
-462	122	-100
-463	117	-87
-463	121	-89
-463	123	-100
-469	131	-105
-474	123	-105
-469	129	-99
-471	128	-99
-472	151	-100
-469	153	-100
-474	129	-105
-474	129	-107
-474	129	-108
-478	121	-102
-461	138	-107
-488	142	-102
-437	118	-96
-451	133	-110
-453	124	-110
-453	122	-110
-451	121	-108
-465	156	-108
-472	141	-98
-472	141	-98
-483	159	-101
-696	130	-51
-483	167	-104
-450	177	-105
-466	180	-103
-474	146	-104
-462	142	-98
-462	142	-99
-447	124	-108
-485	147	-107
-462	138	-110
-462	108	-111
-489	153	-109
-488	152	-103
-488	151	-101
-484	150	-101
-483	153	-92
-606	117	-35
-605	122	-37
-610	120	-36
-490	157	-104
-493	125	-93
-684	121	-36
-683	144	-40
-681	133	-41
-476	139	-107
-477	135	-105
-471	178	-126
-501	123	-68
-457	135	-118
-470	172	-100
-480	170	-114
-482	169	-116
-508	157	-103
-476	189	-108
-653	124	-46
-452	158	-121
-482	134	-109
-482	134	-109
-491	131	-109
-448	132	-112
-502	135	-118
-494	137	-114
-501	142	-116
-487	151	-122
-506	197	-99
-508	192	-95
-502	183	-97
-507	186	-109
-505	165	-114
-593	186	-128
-594	187	-128
-594	166	-122
-592	184	-117
-511	167	-116
-507	174	-102
-495	162	-124
-495	164	-125
-514	187	-112
-533	186	-107
-494	189	-114
-496	129	-94
-496	135	-95
-495	138	-97
-402	106	-97
-412	107	-99
-405	101	-107
-699	183	-66
-683	158	-52
-682	185	-68
-683	153	-44
-687	176	-42
-695	186	-62
-704	167	-87
-700	173	-81
-694	148	-61
-691	141	-56
-690	143	-60
-704	124	-45
-700	193	-54
-446	109	-108
-423	103	-101
-420	104	-99
-430	126	-107
-432	129	-106
-711	150	-68
-449	155	-119
-442	175	-115
-455	195	-109
-435	165	-115
-455	195	-112
-446	116	-112
-654	147	-69
-436	200	-116
-431	112	-106
-495	100	-120
-500	100	-117
-420	100	-113
-692	102	-70
-446	100	-118
-653	106	-83
-702	193	-73
-598	104	-41
-700	144	-66
-679	128	-79
-690	133	-82
-699	129	-85
-691	130	-80
-691	130	-79
-689	128	-61
-456	101	-98
-686	134	-89
-697	140	-79
-672	101	-77
-430	107	-120
-678	104	-70
-673	101	-73
-675	103	-72
-621	197	-75
-519	184	-112
-527	185	-112
-700	110	-58
-688	170	-75
-692	143	-82
-667	148	-66
-655	155	-73
-672	170	-73
-660	200	-95
-670	156	-101
-664	170	-84
-666	167	-97
-663	142	-91
-630	101	-71
-450	140	-114
-452	142	-109
-440	185	-115
-609	169	-54
-475	145	-100
-695	170	-74
-695	170	-76
-695	110	-57
-590	200	-55
-591	180	-54
-700	190	-70
-508	112	-140
-674	102	-74
-704	185	-85
-489	200	-96
-488	195	-98
-485	198	-97
-483	197	-95
-495	171	-126
-495	169	-126
-495	170	-126
-495	170	-126
-495	169	-126
-498	168	-122
-508	165	-111
-509	164	-111
-506	163	-114
-485	185	-117
-639	103	-54
-649	110	-60
-615	195	-91
-690	163	-89
-650	137	-85
-513	165	-110
-610	107	-50
-650	134	-85
-513	166	-110
-695	175	-73
-695	175	-73
-695	175	-73
-685	163	-72
-670	185	-80
-428	171	-127
-505	110	-49
-508	118	-50
-506	120	-51
-507	122	-51
-511	110	-31
-512	140	-36
-470	112	-45
-473	137	-42
-555	114	-50
-558	113	-50
-523	145	-65
-486	138	-85
-680	195	-116
-557	105	-34
-555	105	-34
-558	109	-32
-556	109	-32
-554	109	-32
-562	116	-29
-560	116	-29
-558	118	-29
-555	122	-29
-560	113	-31
-554	111	-30
-556	115	-29
-554	115	-29
-508	123	-45
-535	134	-43
-549	133	-32
-657	107	-80
-620	200	-62
-620	200	-62
-547	115	-35
-548	115	-36
-560	124	-36
-559	122	-39
-559	120	-41
-560	122	-45
-580	200	-32
-565	126	-40
-455	110	-72
-616	200	-66
-618	193	-71
-564	119	-49
-564	120	-48
-560	140	-48
-558	174	-42
-560	185	-57
-572	128	-60
-570	140	-59
-580	192	-54
-579	134	-49
-550	104	-54
-600	105	-55
-583	175	-56
-660	110	-95
-590	133	-57
-575	130	-56
-555	104	-58
-585	110	-47
-712	106	-82
-707	109	-80
-706	113	-82
-684	115	-98
-697	105	-87
-680	104	-94
-477	115	-86
-478	110	-85
-477	109	-104
-480	119	-65
-560	100	-47
-554	101	-45
-555	104	-25
-604	151	-58
-604	152	-59
-604	154	-60
-604	155	-59
-595	178	-66
-578	105	-56
-575	102	-57
-571	101	-56
-562	108	-49
-488	115	-65
-480	130	-94
-609	155	-51
-493	126	-77
-598	102	-56
-646	106	-81
-648	110	-83
-645	113	-81
-560	133	-52
-565	139	-60
-510	154	-129
-710	103	-99
-668	145	-70
-661	142	-73
-663	150	-71
-664	151	-72
-565	102	-49
-572	106	-52
-590	112	-53
-590	117	-54
-602	109	-59
-592	125	-55
-590	125	-55
-589	125	-56
-588	137	-56
-578	138	-59
-578	136	-60
-578	134	-60
-605	136	-68
-605	132	-67
-602	148	-57
-588	125	-56
-612	157	-66
-587	142	-48
-590	135	-44
-589	138	-43
-585	133	-42
-590	120	-34
-588	123	-31
-594	135	-50
-595	115	-42
-610	165	-60
-633	121	-82
-680	138	-84
-638	132	-81
-627	126	-74
-600	157	-53
-599	154	-52
-599	151	-50
-598	149	-32
-605	155	-54
-604	152	-55
-603	150	-57
-604	163	-65
-510	198	-117
-613	132	-76
-582	154	-72
-584	156	-75
-579	151	-72
-544	168	-75
-546	168	-72
-513	188	-103
-645	185	-133
-597	150	-63
-588	143	-62
-594	146	-64
-568	147	-81
-577	145	-82
-545	125	-77
-588	190	-60
-585	180	-76
-587	180	-77
-589	175	-78
-604	150	-69
-585	140	-58
-577	135	-60
-565	120	-54
-590	143	-71
-598	154	-74
-578	151	-92
-558	155	-85
-489	140	-70
-487	143	-68
-490	134	-71
-612	122	-65
-566	155	-68
-565	145	-89
-558	154	-85
-555	150	-84
-504	138	-93
-492	117	-89
-502	126	-95
-469	130	-93
-508	148	-98
-499	143	-95
-501	134	-87
-498	136	-89
-572	173	-82
-503	148	-88
-504	140	-90
-571	175	-87
-573	172	-88
-582	124	-96
-497	128	-100
-578	114	-86
-540	154	-92
-582	186	-94
-550	152	-101
-530	180	-100
-545	168	-98
-570	155	-108
-513	148	-88
-517	182	-80
-515	192	-87
-520	194	-120
-515	155	-100
-520	155	-100
-524	133	-95
-549	141	-103
-542	141	-96
-512	141	-95
-540	135	-98
-545	153	-102
-403	139	-80
-502	113	-110
-562	166	-100
-542	132	-97
-564	163	-104
-560	154	-103
-563	148	-105
-563	129	-106
-548	131	-99
-548	103	-88
-543	102	-84
-539	107	-109
-542	119	-100
-401	153	-106
-412	172	-100
-513	123	-101
-518	132	-101
-550	125	-99
-542	129	-105
-527	123	-82
-550	176	-121
-538	123	-94
-518	125	-104
-530	131	-102
-498	174	-85
-498	178	-95
-481	129	-83
-473	105	-90
-490	122	-85
-405	155	-121
-411	160	-125
-415	168	-125
-411	156	-127
-404	152	-127
-424	195	-118
-423	190	-115
-425	185	-112
-427	184	-113
-528	108	-87
-543	117	-96
-539	135	-106
-540	137	-105
-540	126	-99
-543	126	-99
-417	102	-101
-401	109	-111
-411	101	-123
-400	104	-118
-552	131	-104
-550	127	-105
-553	131	-106
-555	125	-105
-556	127	-92
-557	119	-89
-559	117	-82
-557	119	-100
-561	124	-100
-555	115	-103
-559	105	-98
-540	157	-105
-547	126	-110
-546	166	-105
-534	190	-117
-533	191	-117
-533	191	-117
-527	169	-106
-521	136	-116
-533	175	-101
-526	159	-123
-524	140	-109
-551	184	-122
-515	150	-116
-527	153	-118
-510	149	-112
-527	150	-115
-408	112	-135
-425	121	-135
-427	105	-134
-419	104	-141
-411	129	-114
-409	127	-104
-408	130	-105
-436	107	-121
-437	116	-121
-438	119	-121
-405	123	-121
-434	112	-121
-425	160	-89
-403	119	-126
-401	122	-126
-562	133	-97
-562	134	-97
-555	146	-98
-555	144	-96
-556	144	-97
-553	150	-98
-550	155	-100
-558	152	-105
-552	155	-102
-554	177	-94
-514	176	-104
-422	101	-133
-430	109	-131
-445	105	-140
-434	103	-144
-421	112	-134
-415	117	-136
-431	109	-132
-415	105	-127
-411	156	-125
-408	165	-129
-404	162	-123
-446	116	-130
-458	106	-107
-464	104	-109
-460	108	-117
-405	175	-130
-405	175	-132
-405	176	-132
-406	175	-133
-407	177	-135
-404	177	-135
-410	175	-137
-415	173	-138
-414	174	-139
-413	185	-136
-405	176	-136
-409	176	-138
-410	171	-136
-410	182	-139
-409	175	-137
-411	177	-140
-412	177	-140
-413	178	-140
-411	177	-143
-495	113	-115
-548	109	-103
-475	188	-89
-470	192	-90
-465	198	-92
-467	198	-87
-491	117	-102
-424	103	-158
-477	188	-105
-468	188	-96
-421	100	-159
-430	104	-155
-429	107	-154
-431	115	-166
-505	189	-112
-440	109	-145
-521	105	-102
-531	102	-109
-535	106	-120
-503	106	-121
-513	184	-120
-532	158	-132
-531	158	-129
-524	175	-130
-568	147	-123
-538	115	-108
-518	162	-133
-525	157	-130
-510	136	-121
-498	128	-107
-415	132	-132
-405	122	-136
-534	115	-125
-412	114	-132
-533	118	-130
-591	163	-121
-593	163	-105
-587	133	-85
-545	139	-101
-431	117	-132
-521	142	-133
-520	130	-129
-500	165	-112
-512	137	-132
-456	183	-96
-525	139	-135
-510	140	-136
-563	145	-137
-556	146	-143
-557	127	-116
-548	123	-117
-523	120	-119
-520	101	-135
-559	124	-117
-517	147	-144
-520	152	-148
-553	124	-142
-525	128	-140
-525	128	-142
-525	148	-154
-537	147	-129
-443	115	-149
-550	116	-155
-520	101	-125
-555	110	-156
-573	113	-156
-542	126	-161
-560	111	-163
-402	168	-145
-538	100	-143
-592	113	-96
-576	118	-100
-585	126	-100
-583	101	-101
-585	129	-92
-576	103	-130
-576	104	-131
-574	117	-165
-573	120	-165
-555	104	-168
-555	106	-168
-582	143	-123
-574	107	-125
-575	170	-122
-577	170	-122
-577	170	-130
-562	183	-114
-595	174	-110
-527	107	-144
-527	108	-143
-530	109	-142
-533	107	-148
-533	108	-149
-535	109	-147
-526	104	-158
-509	146	-164
-530	103	-162
-531	120	-165
-521	153	-167
-533	153	-163
-504	152	-158
-504	146	-174
-502	172	-170
-508	193	-175
-505	191	-175
-508	174	-171
-505	153	-158
-508	174	-173
-503	180	-175
-508	170	-178
-510	170	-178
-510	176	-179
-572	199	-130
-575	178	-122
-575	182	-123
-558	173	-145
-560	199	-145
-548	178	-156
-552	183	-150
-557	187	-151
-545	175	-170
-548	178	-164
-552	159	-154
-553	163	-151
-553	160	-145
-557	167	-156
-565	156	-148
-568	170	-148
-545	180	-161
-545	180	-163
-546	188	-166
-548	184	-166
-549	186	-166
-560	193	-145
-572	195	-149
-572	175	-146
-570	167	-147
-465	148	-159
-457	149	-155
-460	157	-153
-463	150	-158
-459	141	-153
-476	147	-164
-469	144	-159
-448	149	-150
-447	153	-157
-443	153	-154
-445	150	-156
-474	188	-133
-447	158	-135
-410	183	-114
-428	170	-134
-426	187	-130
-431	188	-133
-425	187	-133
-476	178	-123
-425	184	-138
-431	199	-143
-483	177	-122
-464	105	-136
-472	186	-110
-429	159	-136
-402	189	-133
-401	186	-131
-447	160	-156
-441	183	-100
-550	200	-148
-459	163	-159
-441	196	-103
-450	188	-117
-432	195	-133
-424	192	-133
-538	172	-145
-416	191	-126
-420	191	-128
-430	195	-143
-417	195	-131
-496	200	-130
-490	200	-126
-460	188	-143
-474	190	-144
-485	191	-150
-488	192	-151
-470	182	-140
-507	170	-169
-480	120	-150
-491	200	-142
-511	200	-158
-507	192	-153
-518	194	-144
-510	190	-146
-512	190	-147
-513	192	-149
-507	200	-152
-509	200	-145
-445	185	-139
-442	160	-142
-488	155	-139
-454	155	-134
-414	174	-123
-538	194	-144
-495	130	-120
-583	188	-127
-490	113	-138
-502	124	-147
-500	120	-155
-471	145	-126
-475	146	-128
-466	147	-130
-520	158	-164
-526	163	-159
-500	127	-137
-523	160	-164
-559	172	-143
-494	120	-139
-500	120	-138
-492	188	-144
-496	186	-145
-499	184	-153
-497	194	-162
-518	191	-153
-518	193	-154
-480	137	-140
-474	133	-136
-470	126	-144
-495	134	-146
-498	127	-157
-498	133	-155
-505	134	-162
-510	199	-164
-510	196	-164
-575	168	-127
-582	184	-127
-501	137	-155
-505	134	-153
-549	187	-144
-460	182	-143
-460	170	-138
-564	117	-138
-549	185	-121
-554	200	-143
-546	111	-143
-554	172	-148
-557	172	-145
-549	177	-147
-551	183	-148
-553	179	-138
-572	168	-147
-571	171	-145
-571	170	-145
-512	197	-163
-559	148	-160
-540	156	-159
-550	113	-147
-553	132	-154
-552	132	-153
-566	158	-142
-567	155	-150
-554	121	-154
-574	150	-146
-534	191	-151
-534	192	-152
-584	180	-147
-566	181	-139
-570	148	-144
-580	164	-156
-580	166	-154
-580	165	-149
-586	160	-145
-540	185	-155
-590	135	-111
-540	187	-152
-598	144	-141
-597	142	-140
-596	148	-139
-582	154	-152
-587	144	-157
-584	141	-160
-582	140	-170
-598	138	-155
-582	160	-170
-582	154	-146
-586	132	-140
-583	141	-141
-588	141	-141
-567	196	-151
-564	115	-130
-563	150	-160
-565	145	-162
-566	147	-158
-582	164	-145
-534	114	-155
-570	133	-160
-572	167	-168
-572	160	-170
-558	119	-159
-582	170	-160
-543	135	-160
-543	134	-161
-541	130	-159
-560	182	-161
-570	180	-163
-553	147	-168
-586	194	-159
-555	157	-169
-565	166	-154
-568	166	-156
-542	147	-160
-545	148	-160
-604	151	-122
-593	182	-153
-593	150	-155
-595	185	-139
-570	130	-161
-585	160	-149
-590	132	-160
-597	125	-140
-591	184	-155
-588	137	-154
-588	180	-154
-591	185	-154
-586	172	-158
-593	185	-155
-593	191	-155
-593	190	-155
-594	185	-150
-594	185	-150
-594	192	-147
-594	192	-147
-594	184	-146
-577	144	-152
-581	144	-153
-586	144	-153
-502	190	-159
-585	195	-153
-587	194	-156
-580	196	-153
-604	196	-149
-600	160	-151
-601	144	-151
-602	141	-149
-598	139	-151
-610	157	-147
-605	197	-152
-577	195	-160
-596	190	-162
-601	192	-161
-602	193	-161
-581	123	-137
-578	124	-139
-576	185	-168
-576	183	-168
-576	181	-168
-583	183	-168
-576	185	-168
-576	185	-168
-579	117	-142
-569	127	-152
-570	139	-160
-577	135	-163
-574	135	-167
-582	163	-169
-566	154	-159
-589	171	-168
-587	171	-167
-579	187	-167
-566	154	-162
-570	155	-159
-593	145	-159
-586	183	-166
-589	181	-166
-593	171	-166
-592	180	-166
-590	153	-168
-585	143	-171
-583	162	-174
-575	153	-176
-579	198	-175
-581	198	-175
-605	197	-173
-569	172	-177
-607	157	-164
-606	146	-158
-602	143	-159
-604	142	-159
-605	140	-159
-606	138	-158
-606	135	-158
-596	172	-183
-596	160	-182
-597	140	-183
-620	140	-167
-615	177	-169
-600	183	-188
-587	184	-190
-556	117	-163
-558	117	-166
-567	129	-161
-579	129	-163
-573	180	-173
-595	196	-180
-571	125	-163
-564	134	-162
-472	115	-163
-574	123	-166
-581	133	-170
-584	138	-175
-566	157	-187
-585	120	-178
-595	123	-183
-570	131	-190
-583	133	-196
-608	121	-181
-596	138	-199
-594	146	-198
-587	166	-187
-585	168	-184
-605	103	-183
-586	110	-186
-610	176	-181
-601	168	-188
-612	132	-193
-600	105	-200
-606	150	-207
-590	198	-198
-599	127	-190
-605	132	-187
-602	145	-196
-589	164	-192
-591	165	-191
-588	179	-189
-590	182	-190
-577	193	-180
-602	122	-196
-593	186	-198
-594	181	-193
-585	182	-195
-591	173	-199
-581	175	-196
-593	161	-194
-596	162	-195
-597	152	-194
-619	150	-191
-610	141	-198
-603	138	-197
-606	136	-194
-596	161	-205
-595	182	-202
-580	168	-198
-574	179	-183
-577	188	-186
-593	130	-194
-590	119	-193
-595	176	-201
-605	175	-201
-605	176	-208
-585	120	-195
-580	121	-199
-584	120	-198
-583	120	-199

## Sheet: Batallones_3_right
x	y	z
555	270	-74
555	270	-74
555	270	-74
530	282	-80
555	270	-74
555	270	-74
555	270	-74
555	270	-74
532	280	-66
374	236	-69
532	280	-66
532	280	-66
400	280	-78
412	278	-82
259	261	-74
261	280	-76
270	270	-77
254	300	-80
281	261	-79
273	255	-79
568	235	-53
336	290	-86
336	290	-86
485	263	-75
344	296	-86
485	300	-94
280	260	-80
336	300	-93
380	249	-70
366	300	-99
366	300	-99
280	291	-92
385	267	-83
307	254	-94
309	256	-93
448	296	-79
447	289	-92
318	280	-81
328	300	-95
320	280	-94
305	298	-100
325	295	-94
316	287	-92
319	268	-94
319	268	-94
314	280	-96
543	204	-50
540	184	-53
548	229	-50
576	237	-53
570	239	-55
577	238	-55
570	236	-54
580	240	-52
319	294	-92
580	245	-52
581	244	-51
440	287	-80
456	288	-88
456	288	-88
456	288	-88
456	288	-88
456	288	-88
456	288	-88
448	284	-88
551	168	-45
540	170	-47
327	280	-96
320	266	-98
314	298	-88
318	299	-99
325	289	-96
328	287	-98
298	263	-94
360	286	-100
355	287	-98
354	287	-98
377	272	-104
379	262	-105
353	255	-101
353	270	-107
380	261	-107
361	250	-100
320	280	-99
313	274	-100
567	219	-66
351	266	-106
366	270	-104
383	268	-104
333	263	-102
324	254	-97
332	245	-97
333	263	-102
333	263	-102
333	263	-102
333	263	-102
333	262	-102
351	258	-101
352	259	-102
318	235	-93
307	237	-84
321	232	-91
323	231	-92
331	226	-92
319	238	-98
317	226	-99
341	238	-102
370	269	-207
359	242	-203
370	243	-84
354	222	-95
328	230	-95
352	222	-95
328	229	-94
370	289	-109
346	281	-100
347	273	-98
347	273	-98
330	271	-98
450	266	-187
352	200	-102
360	202	-105
357	199	-104
591	213	-69
481	298	-86
303	280	-106
379	250	-104
380	247	-106
395	254	-105
391	199	-100
478	294	-102
484	298	-77
468	296	-78
449	261	-91
444	132	-48
434	270	-98
429	272	-97
419	275	-101
516	143	-54
512	151	-52
458	218	-83
459	223	-83
478	222	-82
481	245	-88
481	245	-88
468	222	-85
425	285	-103
483	222	-90
487	222	-89
484	217	-86
465	224	-83
497	221	-82
493	220	-84
499	226	-84
475	258	-88
477	270	-92
517	295	-80
385	300	-84
329	200	-67
368	207	-79
359	209	-77
355	215	-81
361	211	-79
321	216	-81
322	217	-82
528	295	-92
379	219	-77
376	208	-78
374	198	-80
379	206	-76
374	204	-78
366	207	-77
370	228	-80
420	251	-70
403	274	-100
401	276	-107
408	292	-117
404	260	-100
406	258	-96
376	230	-93
375	226	-96
402	243	-95
375	213	-89
371	222	-92
378	228	-96
359	227	-95
453	292	-125
441	270	-107
482	216	-128
483	280	-114
483	291	-117
453	259	-108
436	244	-109
471	246	-108
464	229	-96
435	244	-106
452	245	-109
472	240	-106
453	225	-108
468	272	-113
455	270	-107
438	246	-97
437	248	-99
460	229	-97
459	230	-97
436	257	-95
430	204	-104
390	227	-102
388	226	-104
394	238	-105
385	233	-100
364	228	-98
394	196	-87
400	245	-110
375	213	-103
368	210	-99
369	194	-91
479	254	-108
426	242	-114
432	243	-114
431	244	-112
457	227	-113
460	230	-112
455	240	-117
470	260	-127
465	254	-128
486	298	-146
483	283	-145
478	277	-141
462	216	-119
506	295	-145
507	296	-146
497	285	-148
498	286	-147
499	287	-146
495	285	-149
492	265	-143
483	265	-142
493	280	-143
414	270	-121
419	285	-131
413	204	-106
499	258	-144
504	256	-140
480	268	-135
503	241	-129
517	298	-150
504	270	-142
505	266	-143
532	274	-127
534	276	-129
533	275	-128
510	204	-90
503	204	-102
460	176	-106
469	191	-115
477	204	-127
456	176	-189
504	227	-131
503	231	-135
500	229	-132
464	176	-106
564	274	-88
547	297	-95
552	296	-94
566	295	-85
487	183	-118
464	185	-115
474	178	-117
458	186	-108
449	191	-111
474	187	-121
408	197	-117
475	190	-84
488	176	-121
474	204	-121
566	272	-101
451	185	-123
550	286	-85
552	280	-85
281	120	-43
520	123	-47
520	122	-47
429	197	-76
553	271	-128
568	221	-84
568	245	-89
557	238	-85
309	124	-27
324	119	-26
591	279	-99
573	244	-95
562	225	-91
572	268	-108
574	280	-108
567	271	-106
565	270	-107
584	252	-102
310	170	-84
273	106	-50
320	130	-58
306	143	-63
277	112	-63
270	106	-60
507	113	-51
540	241	-150
524	224	-150
531	226	-149
536	224	-148
515	221	-153
322	123	-55
560	243	-142
563	234	-142
495	180	-105
299	164	-69
304	189	-78
325	173	-68
580	270	-98
599	268	-100
290	168	-60
309	167	-66
573	238	-151
316	160	-72
330	166	-61
313	166	-69
609	234	-106
313	155	-74
526	110	-62
536	109	-60
352	168	-78
305	154	-62
330	161	-59
331	144	-82
293	180	-67
285	172	-67
287	190	-64
291	199	-64
305	190	-65
303	175	-62
307	165	-60
302	159	-57
322	136	-58
318	137	-60
315	138	-61
312	139	-61
325	135	-63
324	135	-63
323	135	-63
320	136	-62
316	136	-63
315	137	-62
321	136	-63
319	161	-68
302	162	-67
532	205	-71
364	140	-72
585	142	-60
587	145	-59
588	141	-61
590	143	-60
377	140	-84
360	155	-83
378	187	-89
377	184	-89
377	185	-86
377	185	-87
579	139	-66
352	155	-88
343	159	-84
357	156	-92
380	141	-88
383	134	-89
409	178	-107
373	140	-84
383	160	-87
383	152	-85
584	193	-84
375	146	-89
378	129	-96
658	142	-71
646	140	-65
646	141	-64
646	147	-63
643	152	-68
645	155	-72
641	143	-65
301	156	-69
287	140	-62
309	125	-65
685	210	-63
687	203	-61
686	195	-62
693	197	-61
696	200	-63
695	193	-64
679	230	-65
698	197	-58
696	200	-64
676	240	-60
676	240	-63
685	200	-66
686	198	-67
270	132	-52
281	145	-55
281	129	-44
263	147	-40
262	143	-54
273	153	-58
262	174	-50
298	174	-49
262	184	-50
213	187	-44
266	184	-61
268	184	-63
423	277	-157
278	154	-61
283	127	-54
283	121	-54
510	156	-50
281	134	-59
281	135	-58
280	135	-56
485	137	-51
483	138	-51
453	154	-49
447	109	-39
457	147	-50
474	131	-39
345	132	-90
466	117	-50
476	121	-55
479	121	-56
467	116	-53
452	127	-49
452	119	-48
453	114	-47
448	110	-41
452	109	-40
449	113	-40
447	114	-38
446	119	-42
444	118	-42
454	121	-44
440	131	-44
446	119	-44
447	120	-45
488	279	-109
455	122	-45
457	121	-47
450	117	-49
450	122	-43
449	125	-45
591	288	-111
590	289	-111
605	296	-113
227	177	-41
224	177	-42
225	177	-42
232	173	-45
236	173	-46
240	173	-47
236	173	-47
238	173	-47
610	290	-75
220	174	-51
227	162	-46
230	157	-31
218	168	-38
200	188	-41
472	102	-52
244	150	-43
246	150	-47
248	150	-45
234	158	-50
225	154	-37
242	154	-35
648	300	-66
605	240	-122
485	220	-121
433	195	-122
640	232	-71
616	286	-99
610	267	-100
441	176	-77
470	178	-83
560	300	-105
565	290	-110
461	275	-125
465	275	-120
486	275	-125
492	274	-120
491	273	-130
421	194	-109
420	185	-103
440	184	-120
440	196	-100
432	179	-129
445	187	-128
455	162	-121
437	180	-107
463	161	-121
604	278	-111
588	297	-113
436	180	-117
437	179	-122
435	178	-120
338	119	-84
455	150	-120
443	156	-116
441	150	-118
438	156	-114
432	153	-116
425	168	-112
422	162	-114
413	163	-111
410	160	-109
405	166	-104
595	290	-103
690	170	-83
678	294	-84
688	293	-86
408	169	-110
643	280	-97
656	294	-103
555	160	-84
651	285	-105
424	138	-119
422	139	-110
412	122	-100
689	275	-100
658	297	-119
657	295	-115
535	183	-126
275	152	-73
267	121	-43
266	122	-44
265	122	-41
642	270	-123
281	129	-56
265	124	-55
270	145	-60
271	117	-52
280	120	-54
665	197	-110
670	189	-112
455	287	-173
667	276	-123
690	171	-111
656	135	-107
641	143	-105
582	300	-118
570	300	-125
633	297	-111
610	292	-118
613	292	-116
612	297	-105
613	298	-105
635	295	-110
634	295	-111
622	295	-107
615	295	-108
712	286	-86
738	203	-34
441	130	-115
459	123	-118
461	124	-117
455	126	-118
334	131	-117
740	142	-65
514	103	-123
529	100	-124
658	116	-106
653	100	-109
663	113	-116
653	104	-108
252	122	-78
329	205	-48
250	290	-42
228	246	-120
439	257	-81
246	244	-111
333	122	-66
340	104	-72
330	103	-68
330	110	-76
363	125	-73
243	275	-64
399	157	-79
411	138	-81
404	141	-79
410	169	-74
405	198	-80
411	188	-74
390	145	-73
435	174	-88
470	178	-110
470	176	-112
495	280	-127
760	259	-69
510	257	-109
500	243	-113
440	234	-102
446	236	-102
445	237	-103
555	112	-117
404	217	-140
455	199	-116
